# Supplementary material for: Environmental pollution with antimicrobial agents from bulk drug manufacturing industries in Hyderabad, South India, is associated with dissemination of extended-spectrum beta-lactamase and carbapenemase-producing pathogens
Source: Springer Nature journal article supplement (doi:10.1007/s15010-017-1007-2), 2017-04-24

## **Supplementary Material**

### **Supplementary Text File 1**

#### **Methodology of liquid chromatography–tandem mass spectrometry**

Thawing of frozen water samples was done in a water bath. All subsequent steps were performed at +4°C. Water samples (100 µL) were rigorously mixed with 100 µL of deuterated internal standard solution followed by centrifugation at 11,000 rpm for 5 minutes. An aliquot of each sample was chromatographed on various analytical columns (Ascentis Express RP-Amide 4.6 x 50 mm 2.7 µm; Phenomenex Kinetex 2.5 µm 50 x 4.6 mm; Phenomenex Kinetex 2.5µm F5 50 x 4.6 mm; PLRP-S, 5 µ, 50 x 4.6 mm; SeQuant ZIC-HILIC 4.6 x 50 mm 5 µm; Symmetry® C18, 50 x 4.6 mm, 3.5 µm; YMC-Pack Phenyl, 50 x 40 mm, 3 µm), eluted with isochromatic or gradient solvent systems. Analytes and internal standards were monitored by LC-MS/MS (PE Sciex API 5000® or API 5500® Mass Spectrometer; PE Sciex Instruments, Thornhill, Ontario, Canada) with a selected reaction monitoring (SRM) method as follows: moxifloxacin (m/z 402.4→m/z 261.3), levofloxacin (not enantioselective m/z 362.2→m/z 261.1), ciprofloxacin (m/z 332.1→m/z 244.9), linezolid (m/z 338.0→m/z 296.4), clarithromycin (m/z 748.9→m/z 158.4), trimethoprim (m/z 291.2→m/z 230.0), sulfamethoxazole (m/z 254.1→m/z 188.2), doxycycline (m/z 445.2→m/z 428.0), penicillin G (m/z 336.2→m/z 160.0), flucloxacillin (m/z 455.0→m/z 160.2), ampicillin (m/z 350.0→m/z 160.0), amoxicillin (m/z 366.2→m/z 208.1), clavulanic acid (m/z 198.1→m/z 108.1), piperacillin (m/z 518.1→m/z 143.3), tazobactam (m/z 301.1→m/z 122.2), cefazolin (m/z 455.3→m/z 295.3), cefuroxime (m/z 423.0→m/z 207.0), ceftazidime (m/z 547.0→m/z 468.2), meropenem (m/z 384.0→m/z 200.2), caspofungin (m/z 547.4→m/z 538.0), anidulafungin (m/z 1140.8→m/z 1122.2), fluconazole (m/z 307.0→m/z 220.0), voriconazole (m/z 350.4→m/z 127.1), posaconazole (m/z 701.3→m/z 683.6), isavuconazole (m/z 438.2→m/z 224.3). Analyst® software (version 1.6.2, Applied Biosystems/MDS Sciex, Thornhill, Ontario, Canada) was used for the evaluation of chromatograms.

For calibration of the quantitation of antibiotics and antifungals in aqueous samples a calibration curve of five (5) standards was prepared as bulk before starting the project. Using the theoretical concentrations of the standards and measured peak area ratios (peak area of analyte/peak area of internal standard), a linear regression using  $1/\text{concentration}^2$  as weighting factor was applied, and the correlation coefficient, slope, and intercept were calculated. Calibration standards were prepared by adding the appropriate amount of stock solutions to drug-free

Milli-Q® water (Merck Millipore, Billerica, Massachusetts, USA). For calculation of the dilution factor for calibration standard L1 the density of Milli-Q® water (1.000 g/mL), acetonitrile (0.7820 g/mL), dimethyl sulfoxide (1.1010 g/mL), ethanol (0.7900 g/mL), and methanol (0.7920 g/mL) were used. The response from calibration standards of the different analytes was linear for moxifloxacin: 0.00598–59.8 µg/mL; levofloxacin: 0.00203-20.3 µg/mL; ciprofloxacin: 0.00496-49.6 µg/mL; linezolid: 0.00531-53.1 µg/mL; clarithromycin: 0.0127-127 µg/mL; trimethoprim: 0.00753-75.3 µg/mL; sulfamethoxazole: 0.00902-90.2 µg/mL; doxycycline: 0.00232-23.2 µg/mL; penicillin G: 0.0259-259 µg/mL; flucloxacillin: 0.0151-151 µg/mL; ampicillin: 0.0127-127 µg/mL; amoxicillin: 0.00459-45.9 µg/mL; clavulanic acid: 0.00190-19.0 µg/mL; piperacillin: 0.0186-186 µg/mL; tazobactam: 0.00687-68.7 µg/mL; cefazolin: 0.0282-282 µg/mL; cefuroxime: 0.0111-111 µg/mL; ceftazidime: 0.0302-302 µg/mL; meropenem 0.0127-127 µg/mL; caspofungin 0.0007980-7.98 µg/mL; anidulafungin 0.000769-7.69 µg/mL; fluconazole: 0.00259-25.9 µg/mL; voriconazole: 0.00126-12.6 µg/mL; posaconazole: 0.000695-6.95 µg/mL; and isavuconazole: 0.00177-17.7 µg/mL. The lowest concentration of the calibration ranges was used as quantification limit.

**Supplementary Figure 1.** Sewage storage in the Patancheru-Kazipally industrial area (when collecting s3)

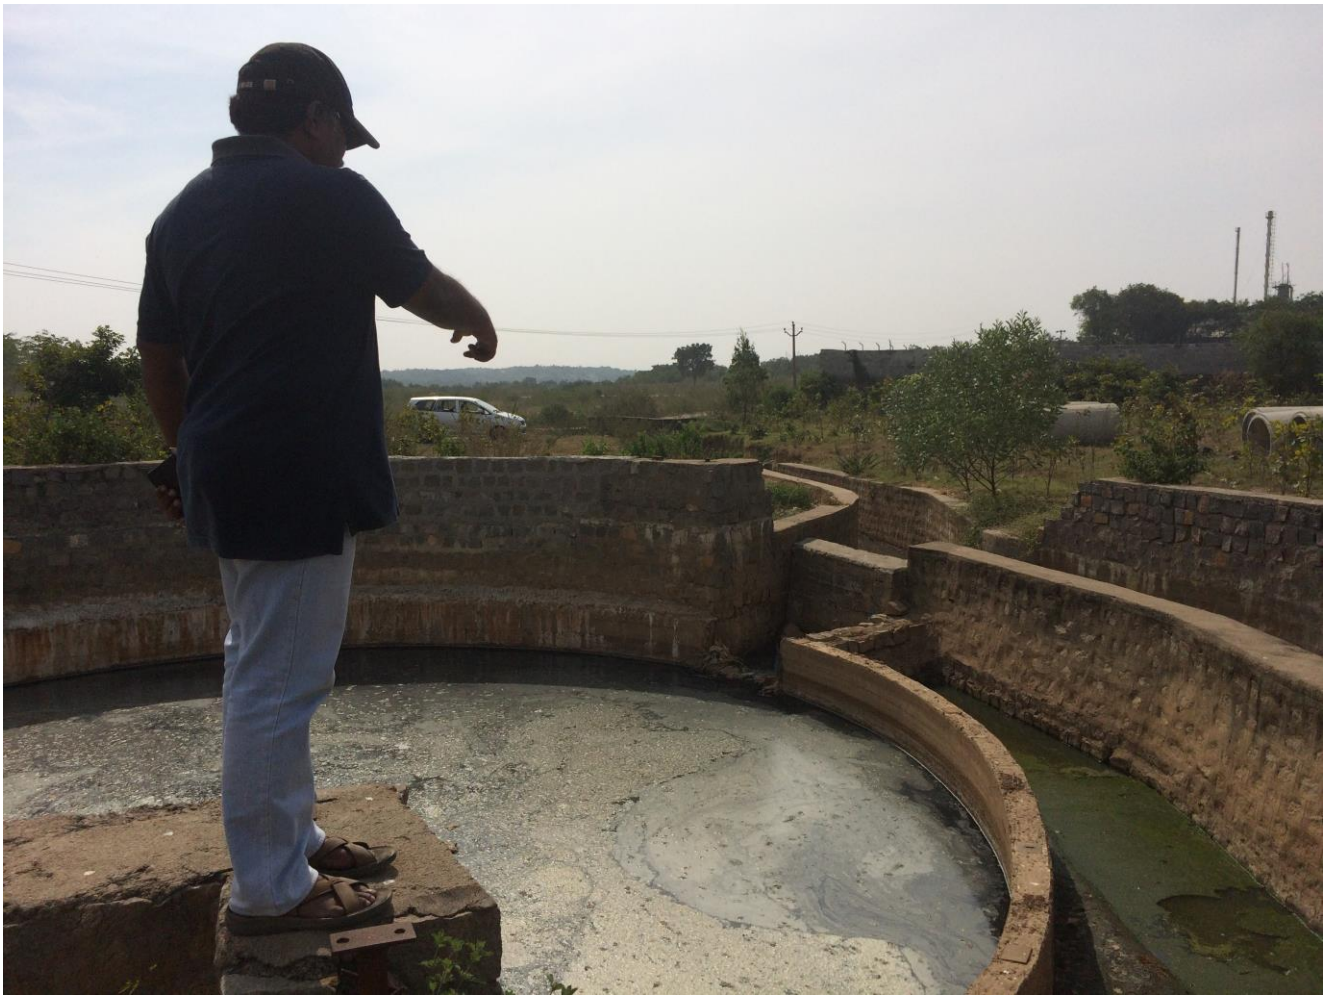

**Supplementary Figure 2.** Delivery of industrial effluent water by trucks at the common effluent treatment plant operated by Patancheru Enviro Tech Ltd. (PETL)

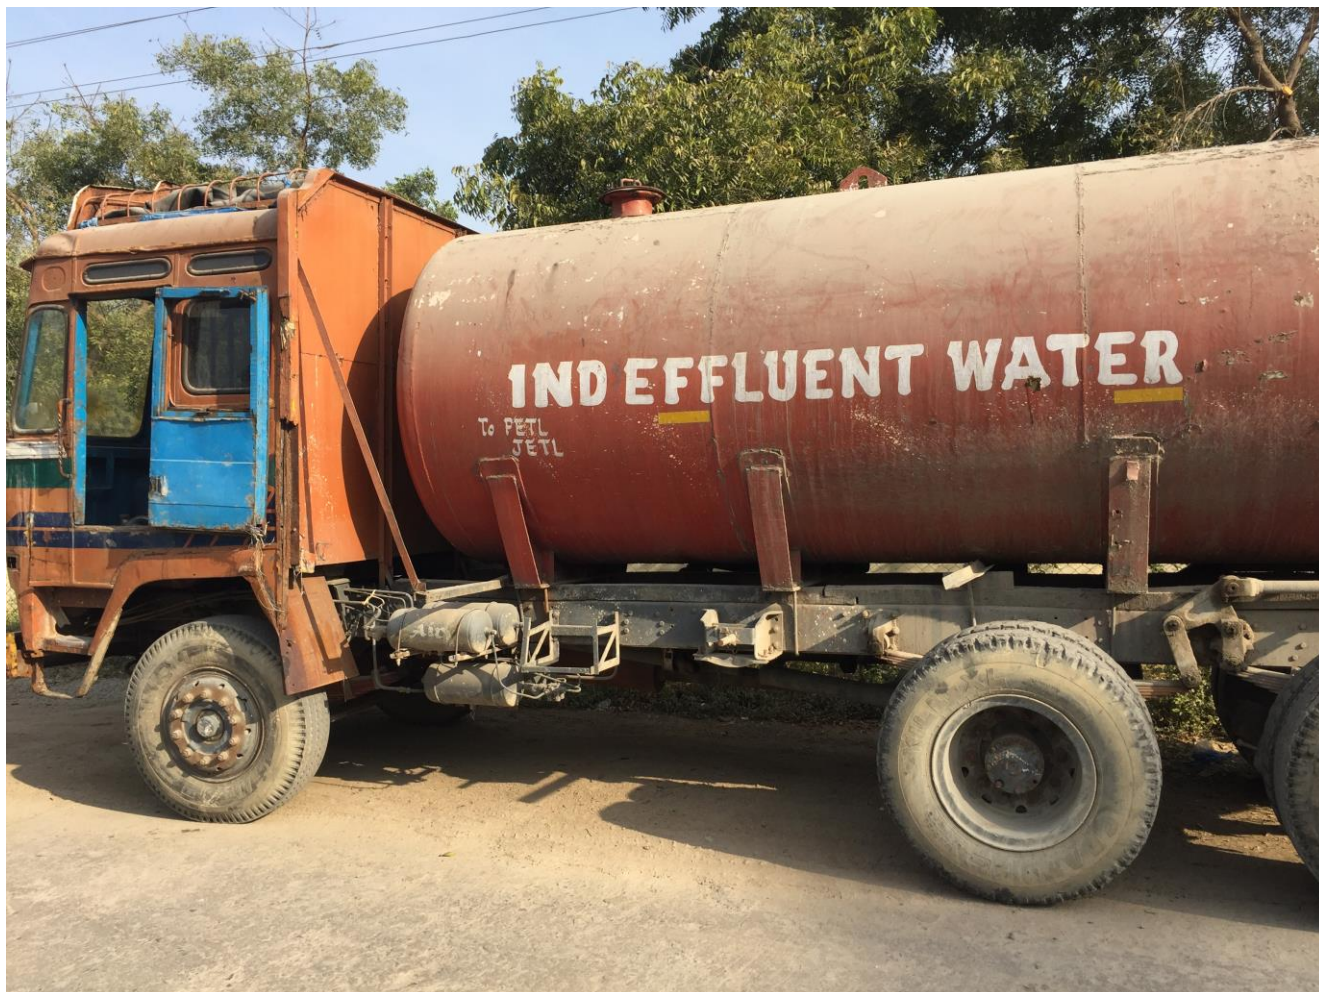

**Supplementary Figure 3.** Musi River in Hyderabad, upstream the Amberpet sewage treatment plant (when collecting s12)

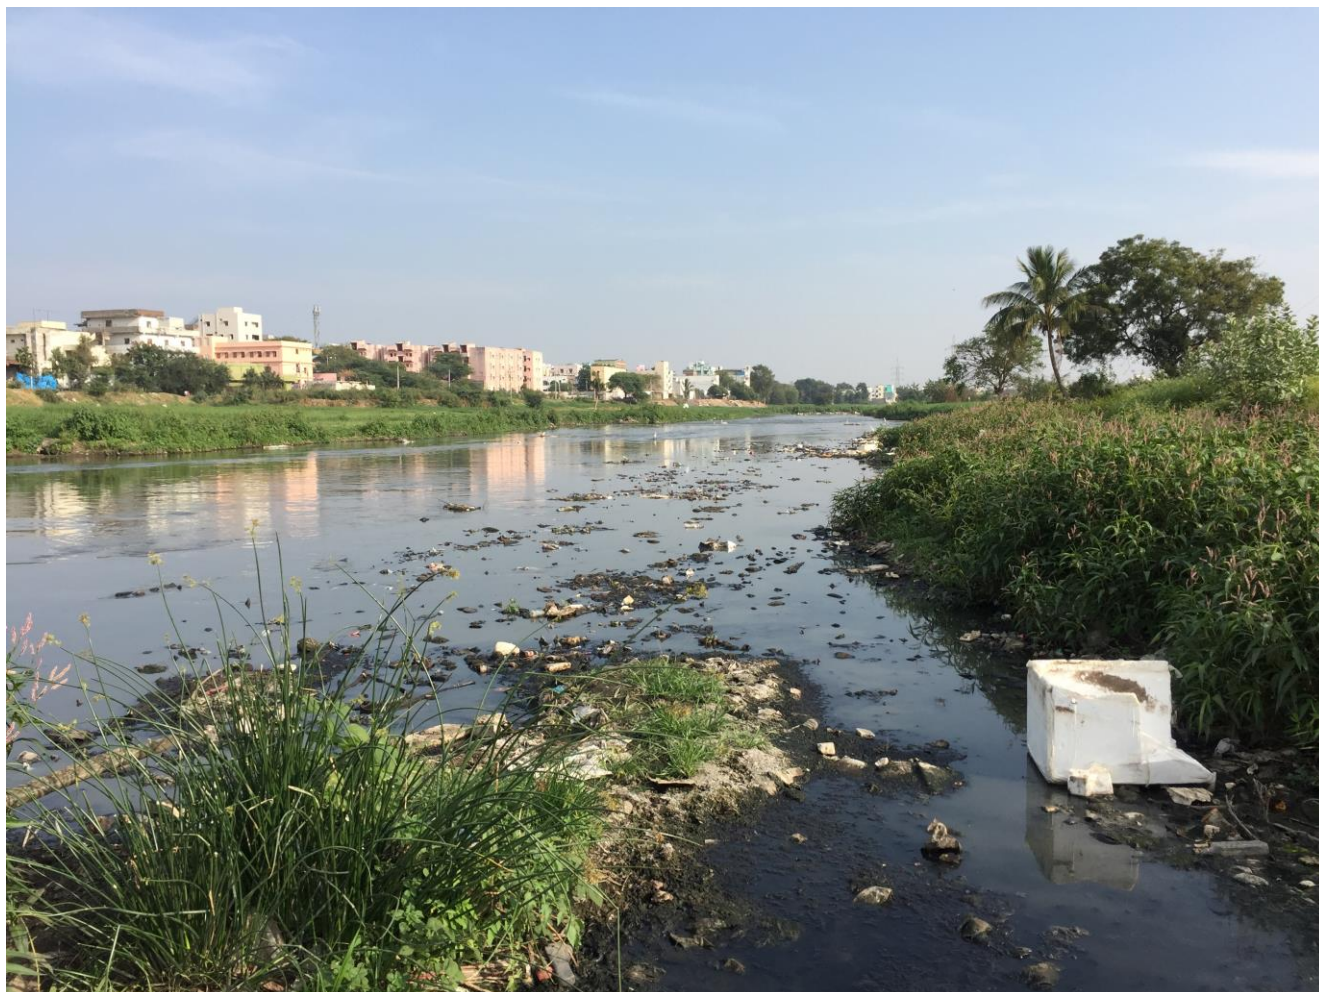

**Supplementary Figure 4.** Collection of environmental samples at the Rudram Village Lake (when collecting s8)

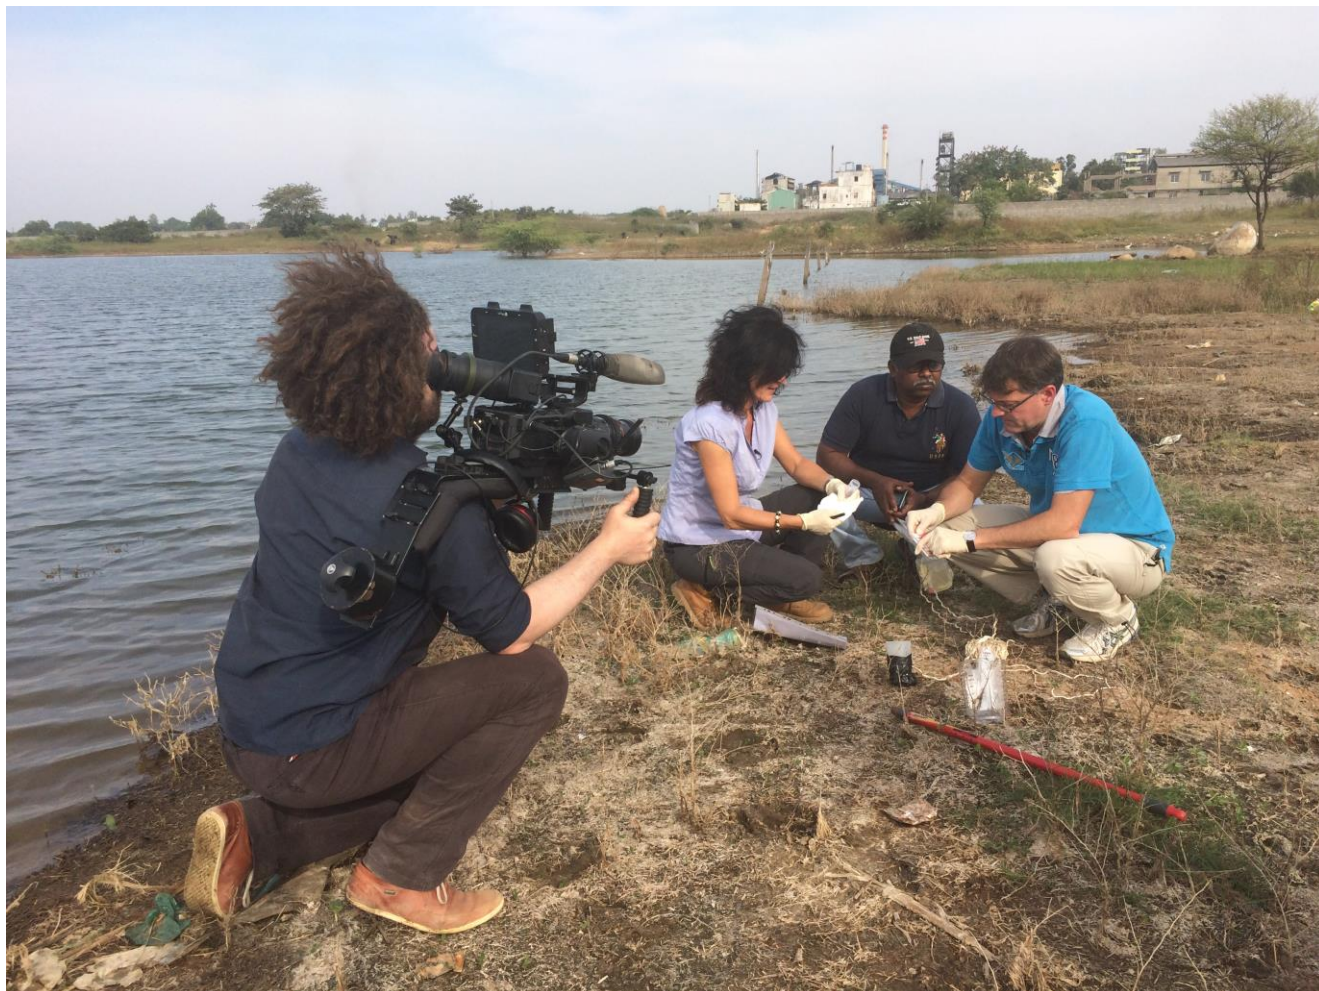

**Supplementary Figure 5.** Pollution on the banks of the Musi River, Hyderabad

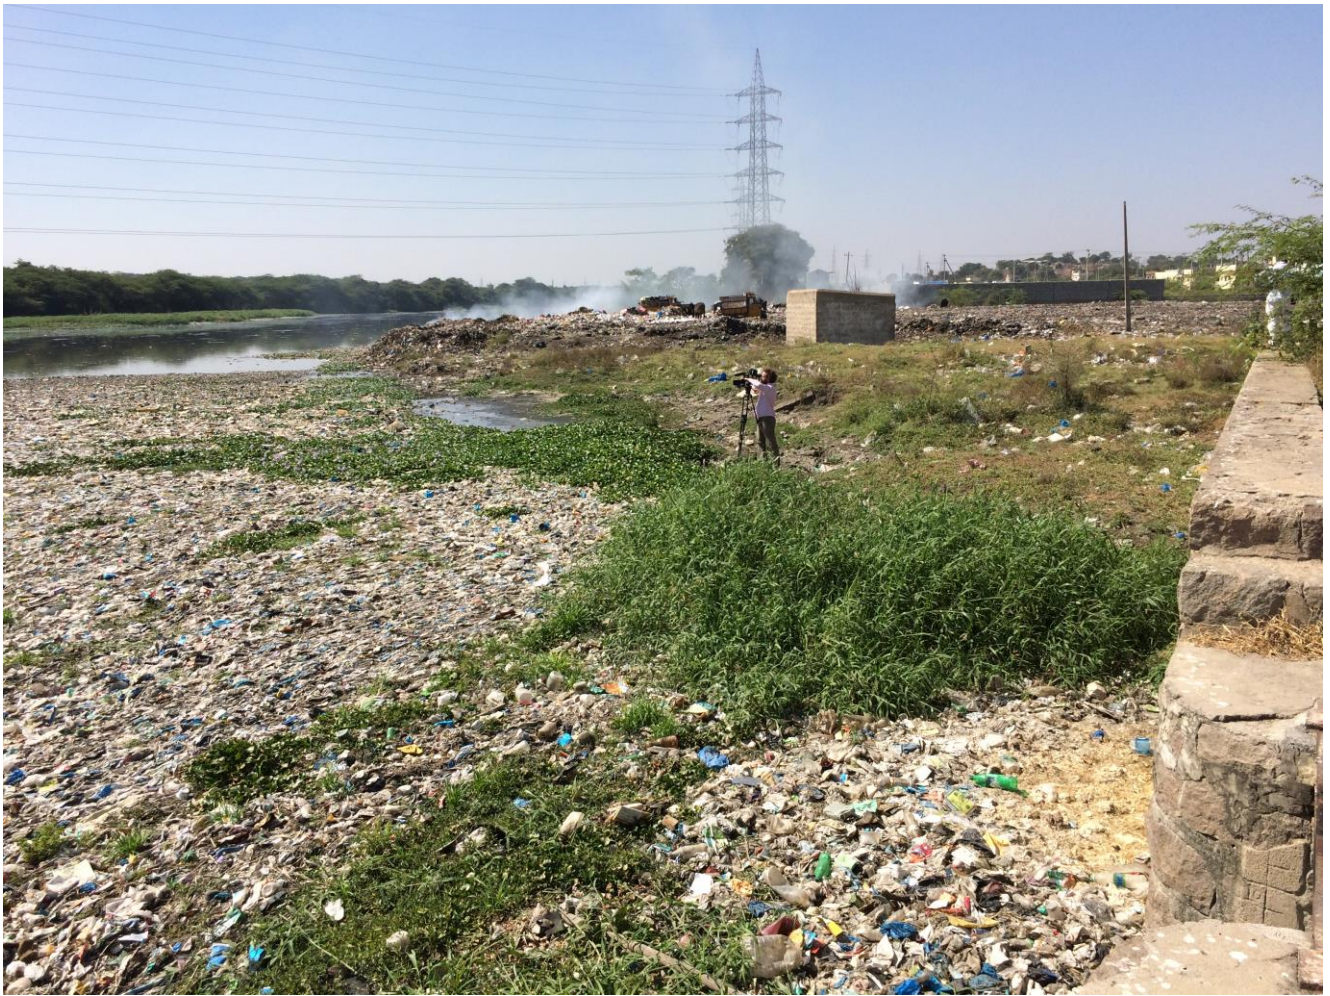

Supplement: 15010_2017_1007_MOESM1_ESM.pdf [file 15010_2017_1007_MOESM1_ESM.pdf]
